# Supplementary material for: Human Single-Chain Antibodies That Neutralize Elastolytic Activity of Pseudomonas aeruginosa LasB
Source: MDPI journal article supplement (doi:10.3390/pathogens10060765), 2021-06-17
Supplement: s1 [file s1]

## Supplementary Material

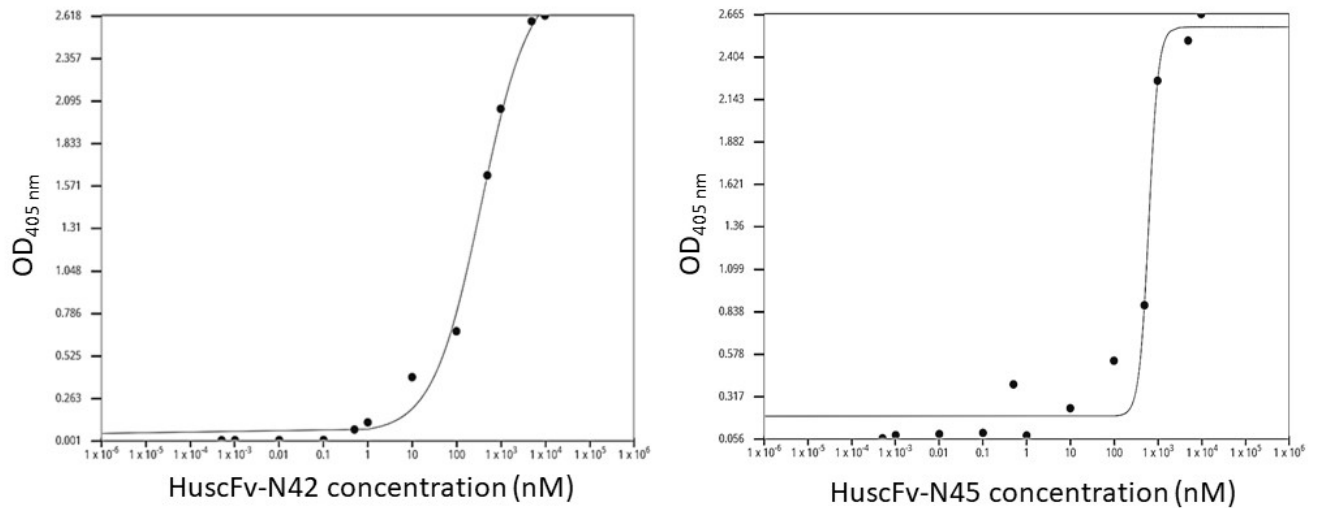

**SUPPLEMENTARY FIGURE S1** | EC<sub>50</sub> of refolded recombinant HuscFvs that bound to native LasB as determined by indirect ELISA. Serial concentrations of purified, refolded HuscFvs at 0.5-10  $\mu$ M were incubated with immobilized nLasB (50 nM) in individual EIA/RIA wells. OD 405 nm signals were determined against blank (antigen-coated well incubated with diluent). The EC<sub>50</sub> graphs of HuscFv-N42 and HuscFv-N45 were generated using EC50 Calculator (<https://www.aatbio.com/tools/ec50-calculator>).

PROCHECK

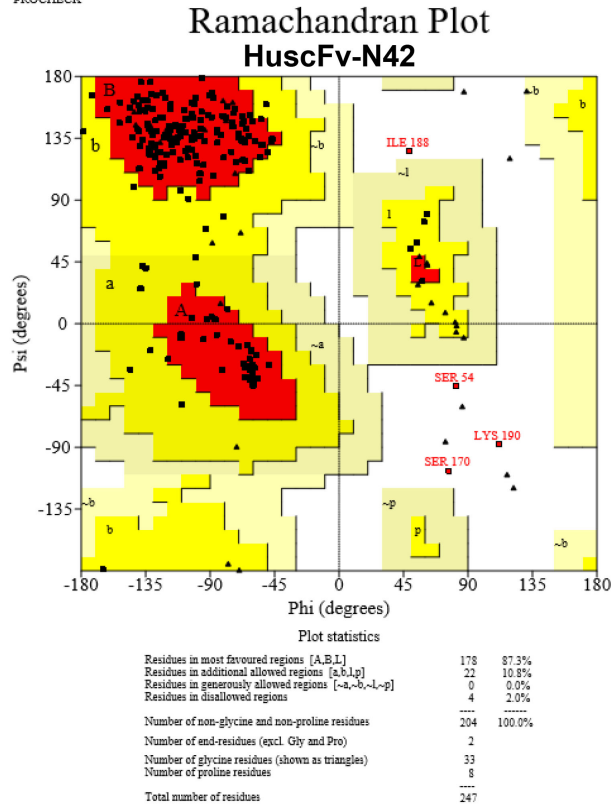

Based on an analysis of 118 structures of resolution of at least 2.0 Angstroms and R-factor no greater than 20%, a good quality model would be expected to have over 90% in the most favoured regions.

PROCHECK

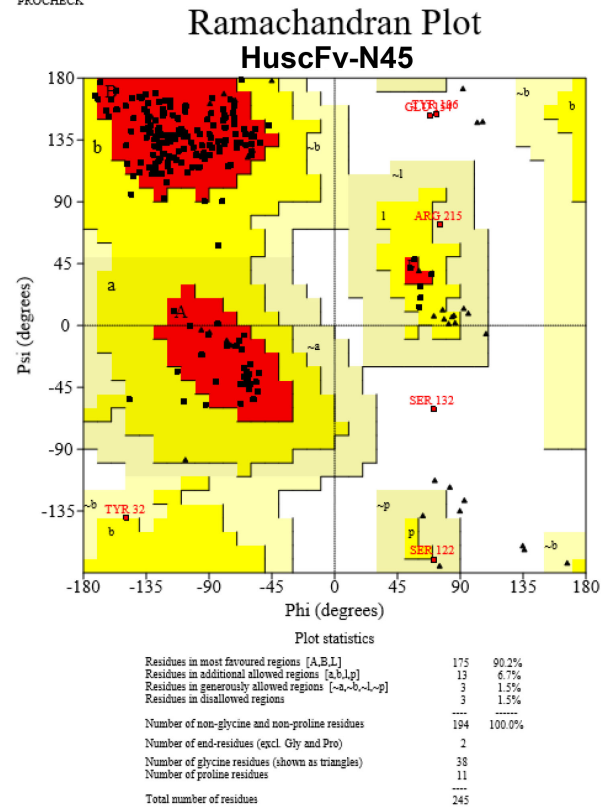

Based on an analysis of 118 structures of resolution of at least 2.0 Angstroms and R-factor no greater than 20%, a good quality model would be expected to have over 90% in the most favoured regions.

**SUPPLEMENTARY FIGURE S2** | Ramachandran plots of the modeled HuscFv-N42 and HuscFv-N45. The most favored regions, additional allowed regions, generously allowed regions and disallowed regions are colored in red, yellow, light yellow, and white, respectively.

**SUPPLEMENTARY TABLE S1** | LC-MS/MS Mascot results of peptides generated from in-gel tryptic digestion of the 33-kDa native LasB of *P. aeruginosa* searching against the NCBI nr database.

| Protein           | Orthologous protein                                                                                                                                                                          | Accession no. | Protein score | Peptide score | Matched peptide sequence |
|-------------------|----------------------------------------------------------------------------------------------------------------------------------------------------------------------------------------------|---------------|---------------|---------------|--------------------------|
| LasB<br>(33 kDa)  | Elastase OS= <i>Pseudomonas aeruginosa</i> (strain ATCC 15692 / DSM 22644 / CIP 104116 / JCM 14847 / LMG 12228 / 1C / PRS 101 / PAO1)                                                        | Gi 156255901  | 304           | 48.43         | NYSAADVTR                |
|                   |                                                                                                                                                                                              |               |               | 48.55         | NYSAADVTR                |
|                   |                                                                                                                                                                                              |               |               | 44.77         | NYSAADVTR                |
|                   |                                                                                                                                                                                              |               |               | 49.1          | NYSAADVTR                |
|                   |                                                                                                                                                                                              |               |               | 40.84         | NYSAADVTR                |
|                   |                                                                                                                                                                                              |               |               | 48.5          | NYSAADVTR                |
|                   |                                                                                                                                                                                              |               |               | 43.82         | FACPTNTYK                |
|                   |                                                                                                                                                                                              |               |               | 55.18         | FACPTNTYK                |
|                   |                                                                                                                                                                                              |               |               | 49.72         | FACPTNTYK                |
|                   |                                                                                                                                                                                              |               |               | 45.17         | GKNDFLIGYDIK             |
|                   |                                                                                                                                                                                              |               |               | 43.42         | GKNDFLIGYDIK             |
|                   |                                                                                                                                                                                              |               |               | 62.11         | SAQNRNYSAADVTR           |
|                   |                                                                                                                                                                                              |               |               | 55.43         | SAQNRNYSAADVTR           |
|                   |                                                                                                                                                                                              |               |               | 36.11         | AFYLLANSPGWDTR           |
|                   |                                                                                                                                                                                              |               |               | 51.79         | AFYLLANSPGWDTR           |
|                   |                                                                                                                                                                                              |               |               | 72.96         | AFYLLANSPGWDTR           |
|                   |                                                                                                                                                                                              |               |               | 64.87         | AFYLLANSPGWDTR           |
|                   |                                                                                                                                                                                              |               |               | 27.74         | YTYGSDYGPLIVNDR          |
|                   |                                                                                                                                                                                              |               |               | 55.55         | AFYLLANSPGWDTRK          |
|                   |                                                                                                                                                                                              |               |               | 41.06         | AFYLLANSPGWDTRK          |
| 55 kDa<br>protein | Immunomodulating metalloprotease<br>OS= <i>Pseudomonas aeruginosa</i> (strain ATCC 15692 / DSM 22644 / CIP 104116 / JCM 14847 / LMG 12228 / 1C / PRS 101 / PAO1) OX=208964 GN=impA PE=1 SV=1 | Gi Q9I5W4     | 73            | 50.86         | TPAIQQECAAR              |
|                   |                                                                                                                                                                                              |               |               | 53.21         | EAGAAQKELGSYAGQR         |
|                   |                                                                                                                                                                                              |               |               | 39.42         | EAGAAQKELGSYAGQR         |

**SUPPLEMENTARY TABLE S2** | The binding affinity ( $\Delta G$ ) and dissociation constant ( $K_d$ ) predicted values of LasB bound to individual HuscFv.

| LasB-HuscFv complex | Complex name        | $\Delta G$ (kcal mol <sup>-1</sup> ) | $K_d$ (M) at 25.0 °C |
|---------------------|---------------------|--------------------------------------|----------------------|
| LasB-N42            | model.000.08        | -15.7                                | 3.10E-12             |
|                     | model.000.09        | -10.3                                | 2.90E-08             |
|                     | model.000.12        | -13.3                                | 1.70E-10             |
|                     | model.000.15        | -12.7                                | 4.80E-10             |
|                     | model.000.06        | -12                                  | 1.60E-09             |
|                     | model.000.07        | -12.1                                | 1.40E-09             |
|                     | model.000.28        | -12.5                                | 6.80E-10             |
|                     | model.000.11        | -12                                  | 1.50E-09             |
|                     | model.000.04        | -14                                  | 5.60E-11             |
|                     | model.000.22        | -13                                  | 3.10E-10             |
|                     | model.000.16        | -9.1                                 | 2.20E-07             |
|                     | model.000.23        | -14.8                                | 1.40E-11             |
|                     | model.000.18        | -14.1                                | 4.80E-11             |
|                     | model.000.05        | -12.5                                | 6.60E-10             |
|                     | model.000.24        | -13                                  | 2.80E-10             |
|                     | model.000.10        | -11.9                                | 1.70E-09             |
|                     | <u>model.000.02</u> | <u>-17.4</u>                         | <u>1.70E-13</u>      |
|                     | model.000.19        | -10.4                                | 2.20E-08             |
|                     | model.000.27        | -11.5                                | 3.80E-09             |
|                     | model.000.01        | -14.8                                | 1.50E-11             |
|                     | model.000.25        | -13.7                                | 8.30E-11             |
|                     | model.000.13        | -13.7                                | 8.30E-11             |
|                     | model.000.17        | -11.6                                | 2.90E-09             |
|                     | model.000.00        | -13.5                                | 1.20E-10             |
|                     | model.000.14        | -15                                  | 9.50E-12             |
|                     | model.000.21        | -12.4                                | 7.80E-10             |
|                     | model.000.20        | -12.2                                | 1.10E-09             |
|                     | model.000.26        | -12.9                                | 3.20E-10             |
|                     | model.000.03        | -12.9                                | 3.40E-10             |

| <b>LasB-HuscFv complex</b> | <b>Complex name</b> | <b><math>\Delta G</math> (kcal mol<sup>-1</sup>)</b> | <b>K<sub>d</sub> (M) at 25.0 °C</b> |
|----------------------------|---------------------|------------------------------------------------------|-------------------------------------|
| LasB-N45                   | model.000.08        | -14.1                                                | 4.30E-11                            |
|                            | model.000.09        | -12.3                                                | 9.40E-10                            |
|                            | model.000.12        | -11.7                                                | 2.50E-09                            |
|                            | model.000.15        | -11.2                                                | 6.40E-09                            |
|                            | model.000.06        | -14                                                  | 5.20E-11                            |
|                            | model.000.07        | -10.7                                                | 1.40E-08                            |
|                            | model.000.28        | -11.9                                                | 1.70E-09                            |
|                            | model.000.11        | -11.9                                                | 1.80E-09                            |
|                            | model.000.04        | -13.5                                                | 1.20E-10                            |
|                            | model.000.22        | -14.7                                                | 1.70E-11                            |
|                            | model.000.16        | -13.2                                                | 2.10E-10                            |
|                            | model.000.23        | -7.6                                                 | 2.70E-06                            |
|                            | model.000.18        | -13.9                                                | 6.20E-11                            |
|                            | model.000.05        | -12.6                                                | 6.20E-10                            |
|                            | model.000.24        | -10.5                                                | 2.00E-08                            |
|                            | model.000.10        | -10.9                                                | 9.70E-09                            |
|                            | model.000.02        | -12.3                                                | 9.90E-10                            |
|                            | model.000.19        | -14.5                                                | 2.30E-11                            |
|                            | model.000.27        | -10.6                                                | 1.80E-08                            |
|                            | model.000.01        | -11.5                                                | 3.60E-09                            |
|                            | model.000.25        | -13.2                                                | 2.20E-10                            |
|                            | model.000.13        | -14.5                                                | 2.20E-11                            |
|                            | model.000.17        | -12.8                                                | 4.10E-10                            |
|                            | model.000.00        | -13.1                                                | 2.50E-10                            |
|                            | model.000.14        | -11                                                  | 9.30E-09                            |
|                            | model.000.21        | -12.1                                                | 1.30E-09                            |
|                            | model.000.20        | -9.7                                                 | 8.00E-08                            |
|                            | model.000.26        | -14.1                                                | 4.50E-11                            |
|                            | <u>model.000.03</u> | <u>-17</u>                                           | <u>3.50E-13</u>                     |

---
